# Supplementary material
Source: MDPI journal article supplement (https://www.mdpi.com/2072-4292/15/9/2441)
Supplement: s1 [file s1]

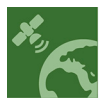

---

Supporting Information for

**Disentangling the Key Drivers of Ecosystem Water-Use Efficiency in  
China's Subtropical Forests Using an Improved Remote Sensing  
Driven Analytical Model**

Tao Chen <sup>1</sup>, Guoping Tang <sup>1,\*</sup>, Ye Yuan <sup>2</sup>, Zhenwu Xu <sup>3,4</sup>, Nan Jiang <sup>1</sup>

1. Department of Physical Geography, Resources and Environment, School of Geography and Planning, Sun Yat-sen University, Guangzhou 510275, China; chent265@mail2.sysu.edu.cn (T.C.); jiangn65@mail2.sysu.edu.cn (N.J.)
2. State Key Laboratory of Desert and Oasis Ecology, Xinjiang Institute of Ecology and Geography, Chinese Academy of Sciences, Urumqi 830011, China; yeyuan.rs@gmail.com (Y.Y.)
3. Key Laboratory of Water Cycle and Related Land Surface Processes, Institute of Geographic Sciences and Natural Resources Research, Chinese Academy of Science, Beijing 100101, China; xuhenwu20@mailsucas.ac.cn (Z.X.)
4. University of Chinese Academy of Sciences, Beijing 100049, China

\* Corresponding author: Guoping Tang (tanggp3@mail.sysu.edu.cn) (G.T.)

**Contents of this file:**

Tables S1–S3

Figures S1–S3

**Table S1.** Model parameters and equations.  $T_a$  is the air temperature (°C);  $T_{opt}$  is optimum temperature for plant growth (°C), and we used the equation proposed by [1], which was also used in the CASA model.  $R_n$  is the net radiation (W/m<sup>2</sup>). RH and VPD are relative humidity (%) and vapor pressure deficit (kPa).  $f_{APAR\_max}$  is the maximum  $f_{APAR}$ ;  $\beta$  (1.28) is the sensitivity of the soil moisture constraint to VPD (kPa);  $k_{Rn}$  (0.6) is the extinction coefficient (unitless) [2].  $b_1 = 0.95$ ,  $b_2 = 0.9355$ ,  $k_1 = 0.57$ , and  $k_2 = 0.81$ .

| Parameter  | Description                               | Equation                                                                    | Reference |
|------------|-------------------------------------------|-----------------------------------------------------------------------------|-----------|
| $f_{wet}$  | Relative surface wetness                  | $f_{wet} = RH^4$                                                            | [3]       |
| $f_g$      | Green canopy fraction                     | $f_g = f_{APAR}/f_{IPAR}$                                                   | [3]       |
| $f_t$      | Plant temperature constraint              | $f_t = \exp \left[ -\left( \frac{T_a - T_{opt}}{T_{opt}} \right)^2 \right]$ | [4]       |
| $f_m$      | Plant moisture constraint                 | $f_m = \frac{f_{APAR}}{f_{APAR\_max}}$                                      | [3]       |
| $f_{sm}$   | Soil moisture constraint                  | $f_{wet} = RH^{VPD/\beta}$                                                  | [3]       |
| $R_{nc}$   | Net radiation to the canopy               | $R_n = R_{nc} - R_{ns}$                                                     | [3]       |
| $R_{ns}$   | Net radiation to the soil                 | $R_{ns} = R_n \times \exp(-k_{Rn} LAI)$                                     | [3]       |
| $f_{APAR}$ | Fraction of PAR absorbed by the canopy    | $f_{APAR} = b_1(1 - \exp(-k_1 LAI))$                                        | [5,6]     |
| $f_{IPAR}$ | Fraction of PAR intercepted by the canopy | $f_{APAR} = b_2(1 - \exp(-k_2 LAI))$                                        | [6,7]     |

**Table S2.** Information description of four flux tower sites (ChinaFLUX) used in this study. EBF: Subtropical evergreen broad-leaved forest; ENF: Subtropical evergreen needle-leaved forest.

| Site name            | Vegetation type | Longitude | Latitude | Elements   | Time range | Reference |
|----------------------|-----------------|-----------|----------|------------|------------|-----------|
| Ailaoshan (ALS)      | EBF             | 101.029°E | 24.538°N | WUE and ET | 2009–2013  | [8,9]     |
| Dinghushan (DHS)     | EBF             | 112.534°E | 23.174°N | WUE and ET | 2003–2010  | [9]       |
| Qianyangzhou (QYZ)   | ENF             | 115.067°E | 26.733°N | WUE and ET | 2003–2010  | [9]       |
| Xishuangbanna (XSBN) | EBF             | 101.267°E | 21.900°N | WUE and ET | 2003–2010  | [9]       |

**Table S3.** Description of the characteristics and measured forest ecosystem water-use efficiency (WUE) (gC kg<sup>-1</sup> H<sub>2</sub>O) that reported in the published literature.

| Ecosystem type | Name         | Longitude | Latitude | Measured WUE | Period | References |
|----------------|--------------|-----------|----------|--------------|--------|------------|
| Forest         | Yueyang (YY) | 112.51°E  | 29.31°N  | 2.26         | 2006   | [10]       |
|                | Huitong (HT) | 109.75°E  | 26.83°N  | 2.36         | 2009   | [11,12]    |
|                | Lin'an (LA)  | 119.34°E  | 30.18°N  | 1.84         | 2011   | [13,14]    |
|                | Hunang (HN)  | 117.00°E  | 33.00°N  | 1.85         | 2005   | [15]       |

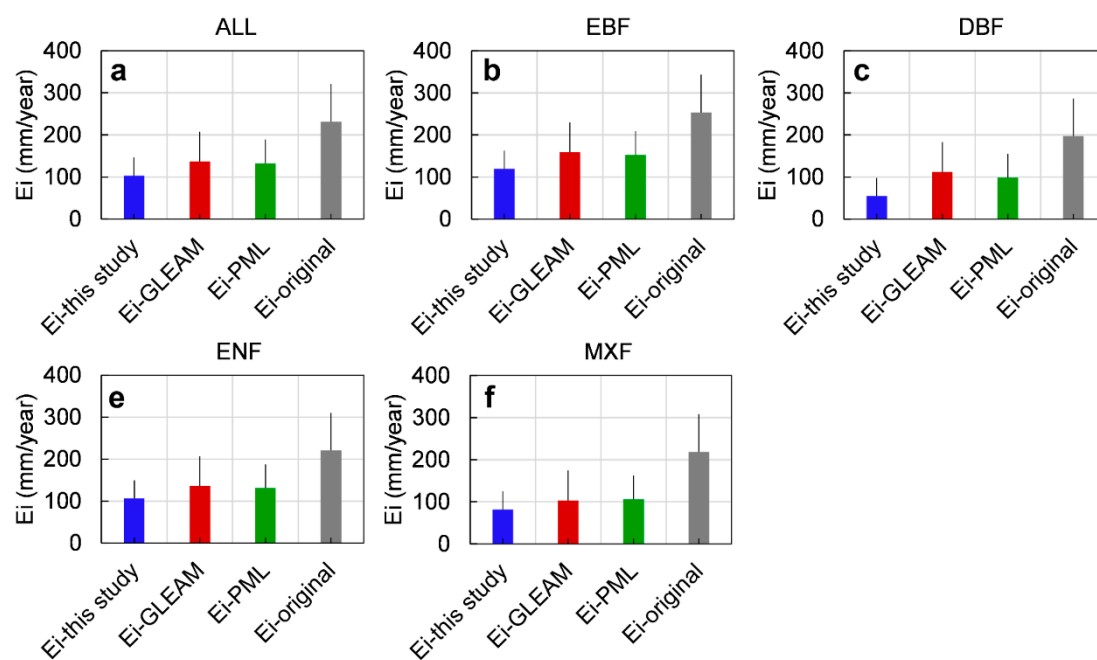

**Figure S1.** Comparison of annual mean (2001–2018)  $E_i$  between this study, GLEAM, PML\_V2, and the original PT-JPL model for the whole forests (a) and different forests (b–f).

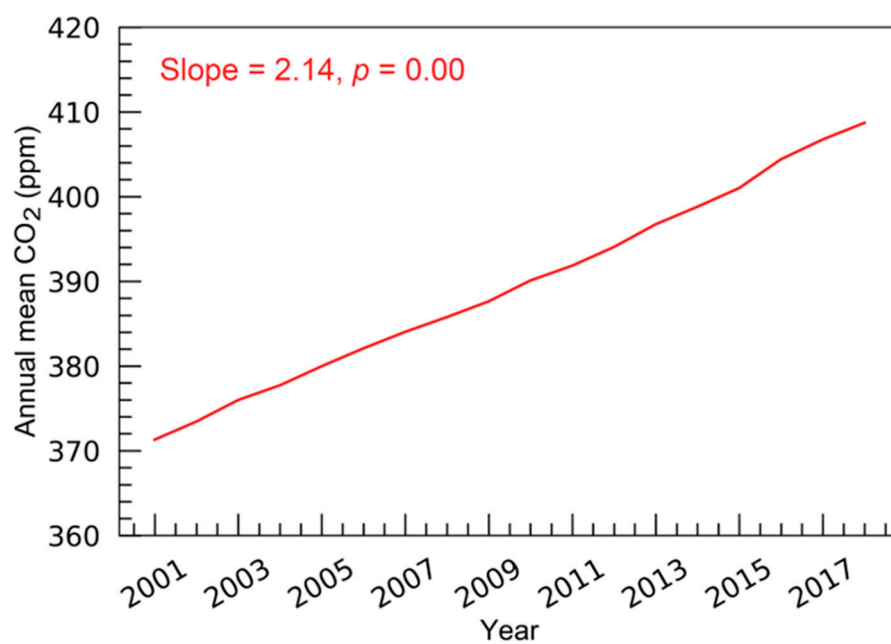

**Figure S2.** Temporal changes of annual mean  $CO_2$  concentration from 2001 to 2018.

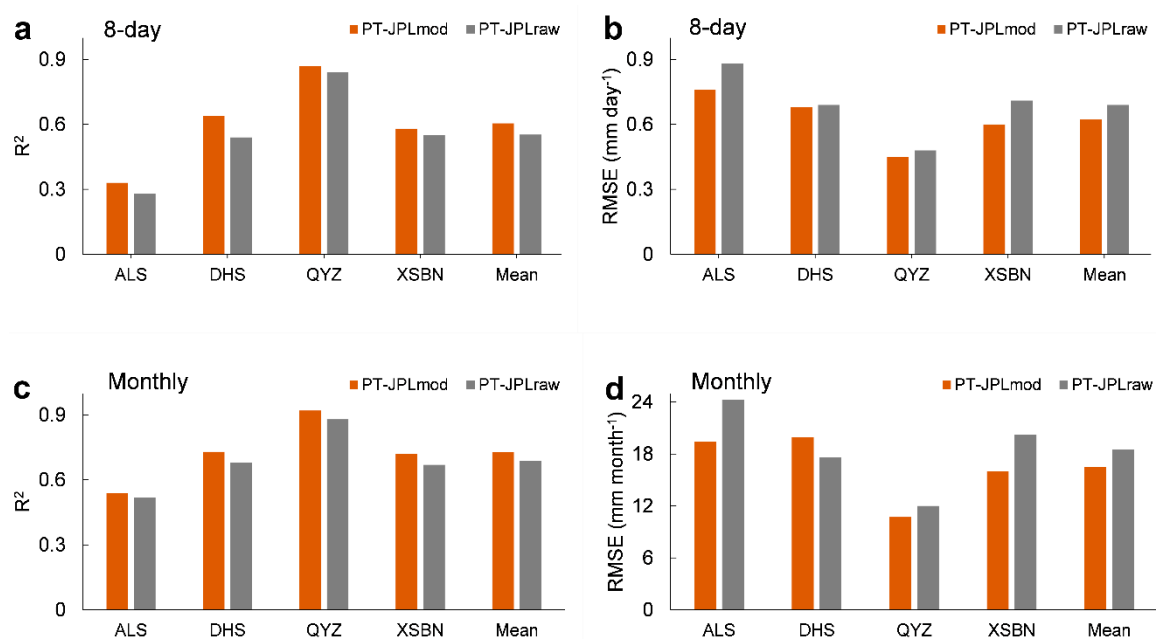

**Figure S3.** The bar chart compares the performance of the improved and original PT-JPL models on simulated ET using the two metrics of  $R^2$  and RMSE. (a,b) compare the performance of the improved and original PT-JPL models on simulated ET at the 8-day scale, respectively; (c,d) compare the performance of the improved and raw PT-JPL models on simulated ET at the monthly scale, respectively. Mean indicates the average of  $R^2$  or RMSE for the four flux stations.

## References

1. Potter, C.S.; Randerson, J.T.; Field, C.B.; Matson, P.A.; Vitousek, P.M.; Mooney, H.A.; Klooster, S.A. Terrestrial Ecosystem Production—A Process Model-Based on Global Satellite and Surface Data. *Glob. Biogeochem. Cycles* **1993**, *7*, 811–841.
2. Impens, I.; Lemur, R. Extinction of net radiation in different crop canopies. *Theor. Appl. Climatol.* **1969**, *17*, 403–412.
3. Fisher, J.B.; Tu, K.P.; Baldocchi, D.D. Global estimates of the land–atmosphere water flux based on monthly AVHRR and ISLSCP-II data, validated at 16 FLUXNET sites. *Remote Sens. Environ.* **2008**, *112*, 901–919.
4. June, T.; Evans, J.R.; Farquhar, G.D. A simple new equation for the reversible temperature dependence of photosynthetic electron transport: A study on soybean leaf. *Funct. Plant Biol.* **2004**, *31*, 275–283.
5. Ruimy, A.; Kergoat, L.; Bondeau, A.; The Participants of The Potsdam NPP Model Intercomparison. Comparing global models of terrestrial net primary productivity (NPP): Analysis of differences in light absorption and light-use efficiency. *Glob. Chang. Biol.* **1999**, *5*, 56–64.
6. Niu, Z. et al. Niu, Z.; He, H.; Zhu, G.; Ren, X.; Zhang, L.; Zhang, K.; Zhu, X. An increasing trend in the ratio of transpiration to total terrestrial evapotranspiration in China from 1982 to 2015 caused by greening and warming. *Agric. For. Meteorol.* **2019**, *279*, 107701.
7. Hipps, L.E. Assessing the interception of photosynthetically active radiation in winter wheat. *Agric. Meteorol.* **1983**, *28*, 253–259.
8. Qi, D.; Fei, X.; Song, Q.; Zhang, Y.; Sha, L.; Liu, Y.; Zhou, W.; Lu, Z.; Fan, Z. A dataset of carbon and water fluxes observation in subtropical evergreen broad-leaved forest in Ailao Shan from 2009 to 2013. *China Scientific Data*, 6 March 2021. <https://doi.org/10.11922/csdata.2020.0089.zh>.
9. Yu, G.R.; Wen, X.F.; Sun, X.M.; Tanner, B.D.; Lee, X.; Chen, J. Overview of ChinaFLUX and evaluation of its eddy covariance measurement. *Agric. For. Meteorol.* **2006**, *137*, 125–137.
10. Wei, Y.; Gao, S.; Zhang, X.; Geng, S.; Zhao, X.; Jiang, Z.; Wang, Y. Source area in-FLUX measurements by FSAM model over the *Populus deltoides* plantation in Yueyang. *Sci. Silvae Sin.* **2012**, *48*, 16–21.
11. Wang, S.; Zhang, Q.; Yue, P.; Wang, J.; Yang, J.; Wang, W.; Ren, X. Characteristics of latent heat flux over *Cunninghamia lanceolata* plantations in Huitong county. *J. Cent. South Univer. For. Technol.* **2011**, *31*, 192–197.
12. Zhao, Z. A study on carbon flux between Chinese Fir plantations and atmosphere in subtropical belts. Ph.D. Thesis, Central South University of Forestry and Technology, Changsha, China, 2011.
13. Chen, Y.; Jiang, H.; Zhou, G.; Shuang, Y.; Chen, J. Estimation of CO<sub>2</sub> fluxes and its seasonal variations from the effective management Lei bamboo (*Phyllostachys Violascens*). *Acta Ecol. Sin.* **2013**, *33*, 3434–3444.
14. Lin, E.; Jiang, H.; Chen, Y. Water vapor flux variation and net radiation for a *Phyllostachys violascens* stand in Taihuyuan. *J. Zhejiang AF Univ.* **2013**, *30*, 313–318.
15. Zhu, X.J.; Yu, G.R.; Wang, Q.F.; Hu, Z.M.; Zheng, H.; Li, S.G.; Hao, Y.B. Spatial variability of water use efficiency in China's terrestrial ecosystems. *Global Planet. Chang.* **2015**, *129*, 37–44.
